# Supplementary material for: Electropolymerizable N-heterocyclic carbene complexes of Rh and Ir with enantiotropic polymorphic phases
Source: Royal Society of Chemistry journal article supplement (doi:10.1039/c9dt04844h), 2020-01-01

# Electropolymerizable N-heterocyclic carbene complexes of Rh and Ir with enantiotropic polymorphic phases.

Weiran Wang, Vincent M Lynch, Hongyu Guo, Anwasha Datta and Richard A Jones\*

Department of Chemistry, The University of Texas at Austin, 105 E. 24th Street, Stop A5300, Austin, Texas 78712-1224, USA.

## Supporting Information

### Table of Contents

|                                                                                                                                                                                                                                                                                                                                 |      |
|---------------------------------------------------------------------------------------------------------------------------------------------------------------------------------------------------------------------------------------------------------------------------------------------------------------------------------|------|
| Fig. S1. Simulated and experimental PXRD traces of polycrystalline <b>1</b> at 100 K and 298 K. ....                                                                                                                                                                                                                            | 2    |
| Fig. S2. CV of <b>poly-1</b> and <b>poly-2</b> in monomer-free electrolyte solution in CH <sub>2</sub> Cl <sub>2</sub> . Insets show the linear relationship between current at peak oxidation/reduction potentials and scan rates. All potentials are reported with referenced to Fc/Fc <sup>+</sup> couple as 0 V. ....       | 3    |
| Fig. S3. Deconvoluted (a) N 1s, (b) S 2p, (c) P 2p and (d) I 3d XPS spectra of <b>poly-1</b> on ITO coated glasses. ....                                                                                                                                                                                                        | 4    |
| Fig. S4. Deconvoluted (a) N 1s, (b) S 2p and (c) Ir 4f XPS spectra of <b>poly-2</b> on ITO coated glasses. ....                                                                                                                                                                                                                 | 5    |
| Fig. S5. (a) Stacked molar absorptivity traces of <b>L</b> (black line), <b>1</b> (red line) and <b>2</b> (blue line) in CH <sub>2</sub> Cl <sub>2</sub> . (b) Stacked emission traces of <b>L</b> (3.1 μM, black line), <b>1</b> (3.0 μM, red line) and <b>2</b> (3.0 μM, blue line) in CH <sub>2</sub> Cl <sub>2</sub> , .... | 6    |
| NMR Spectra of <b>1</b> and <b>2</b> .....                                                                                                                                                                                                                                                                                      | 7-10 |

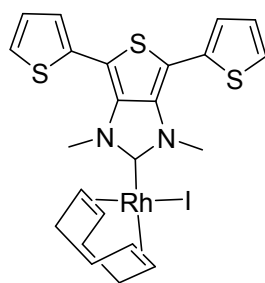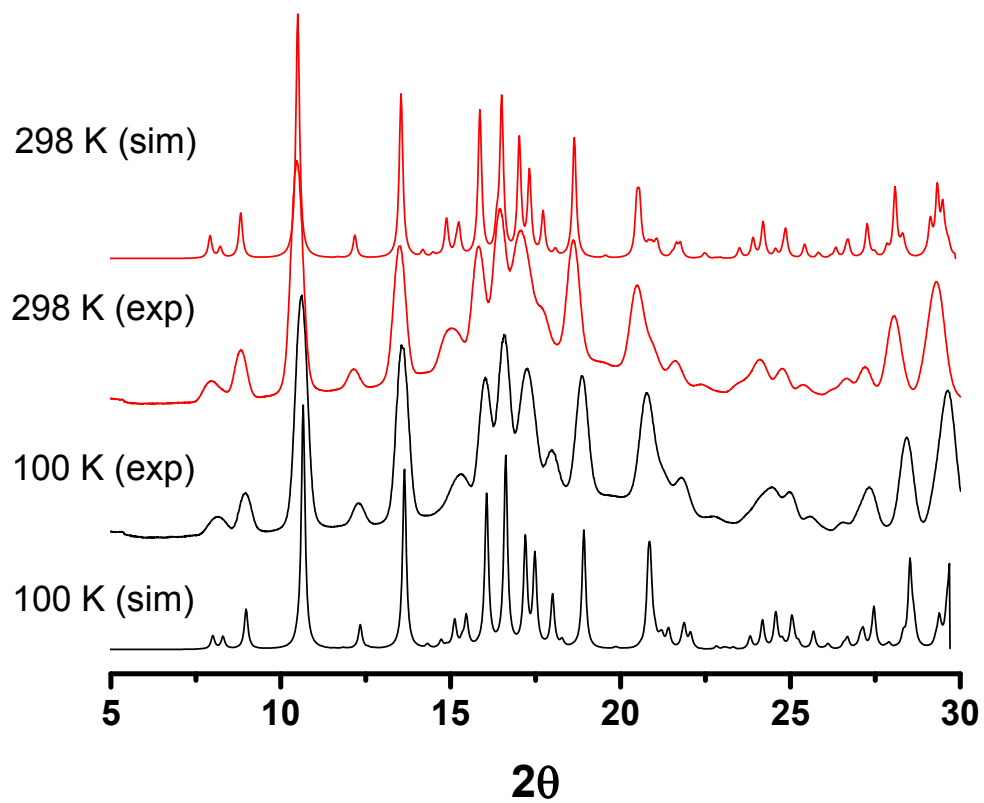

Fig. S1. Simulated and experimental PXRD traces of polycrystalline **1** at 100 K and 298 K.

(a)

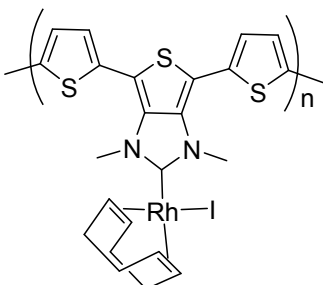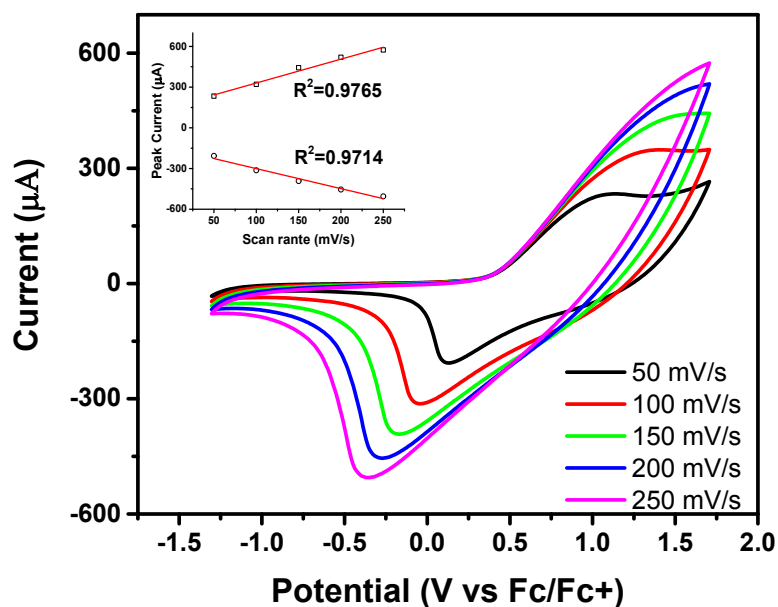

(b)

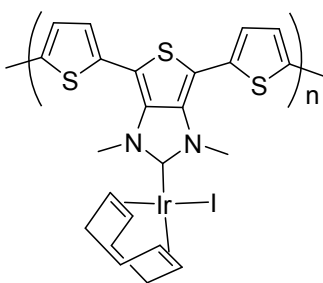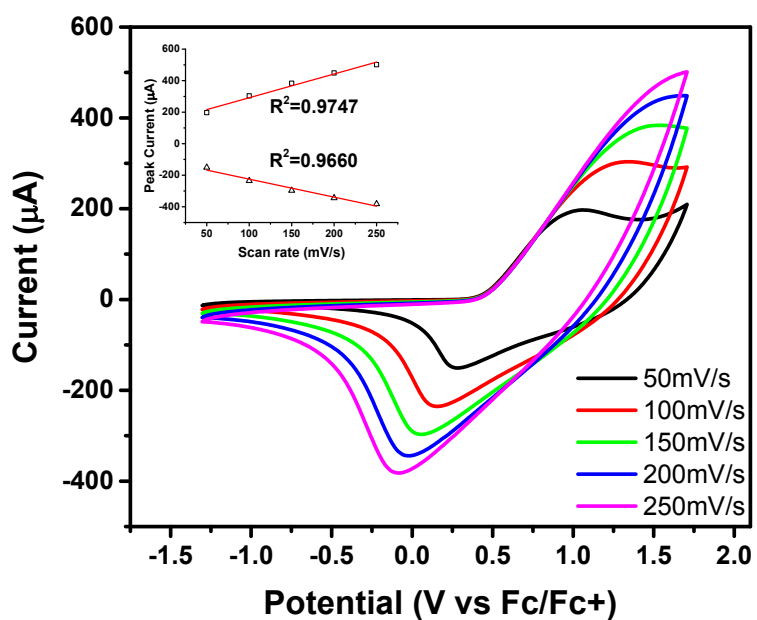

Fig. S2. CV of **poly-1** and **poly-2** in monomer-free electrolyte solution in CH<sub>2</sub>Cl<sub>2</sub>. Insets show the linear relationship between current at peak oxidation/reduction potentials and scan rates. All potentials are reported with referenced to Fc/Fc<sup>+</sup> couple as 0 V.

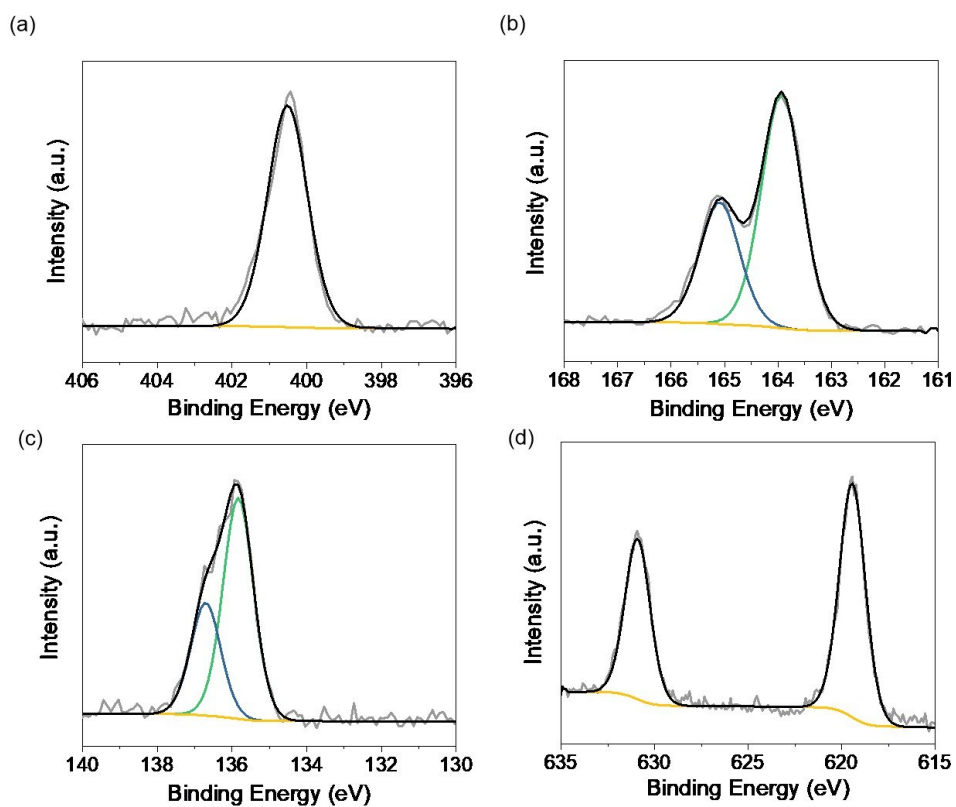

Fig. S3. Deconvoluted (a) N 1s, (b) S 2p, (c) P 2p and (d) I 3d XPS spectra of **poly-1** on ITO coated glasses.

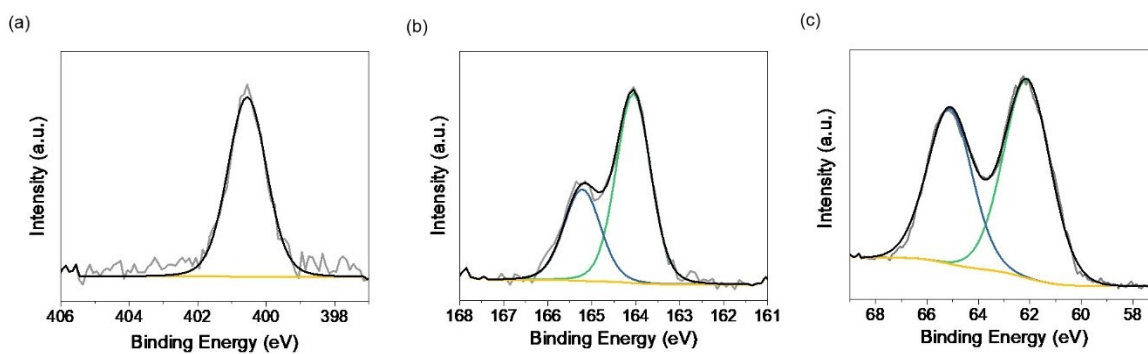

Fig. S4. Deconvoluted (a) N 1s, (b) S 2p and (c) Ir 4f XPS spectra of **poly-2** on ITO coated glasses.

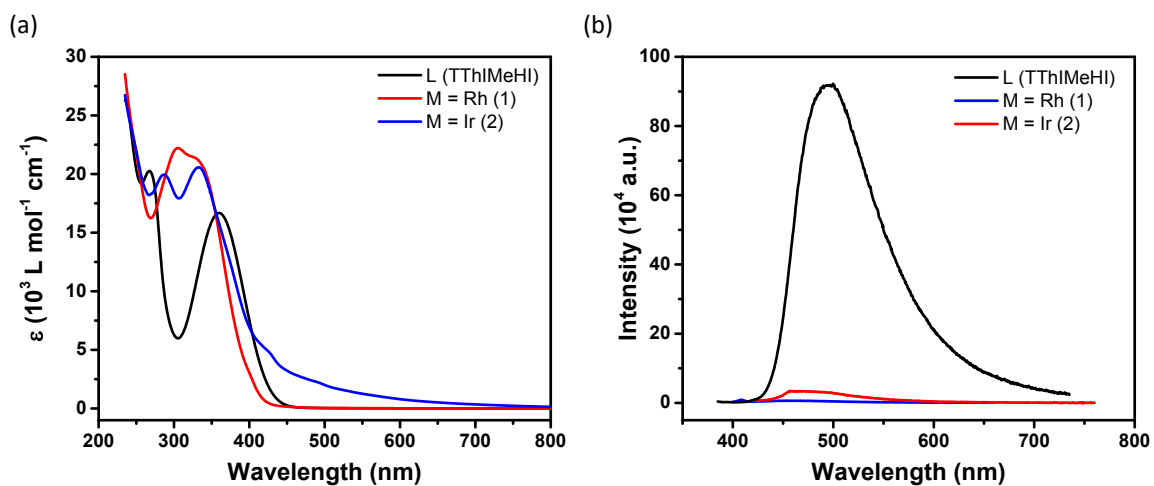

Fig. S5. (a) Stacked molar absorptivity traces of **L** (black line), **1** (red line) and **2** (blue line) in CH<sub>2</sub>Cl<sub>2</sub>. (b) Stacked emission traces of **L** (3.1  $\mu\text{M}$ , black line), **1** (3.0  $\mu\text{M}$ , red line) and **2** (3.0  $\mu\text{M}$ , blue line) in CH<sub>2</sub>Cl<sub>2</sub>,

1\_1H\_NMR

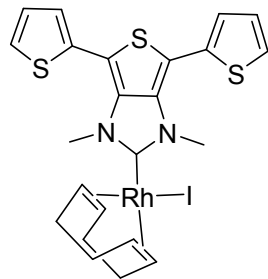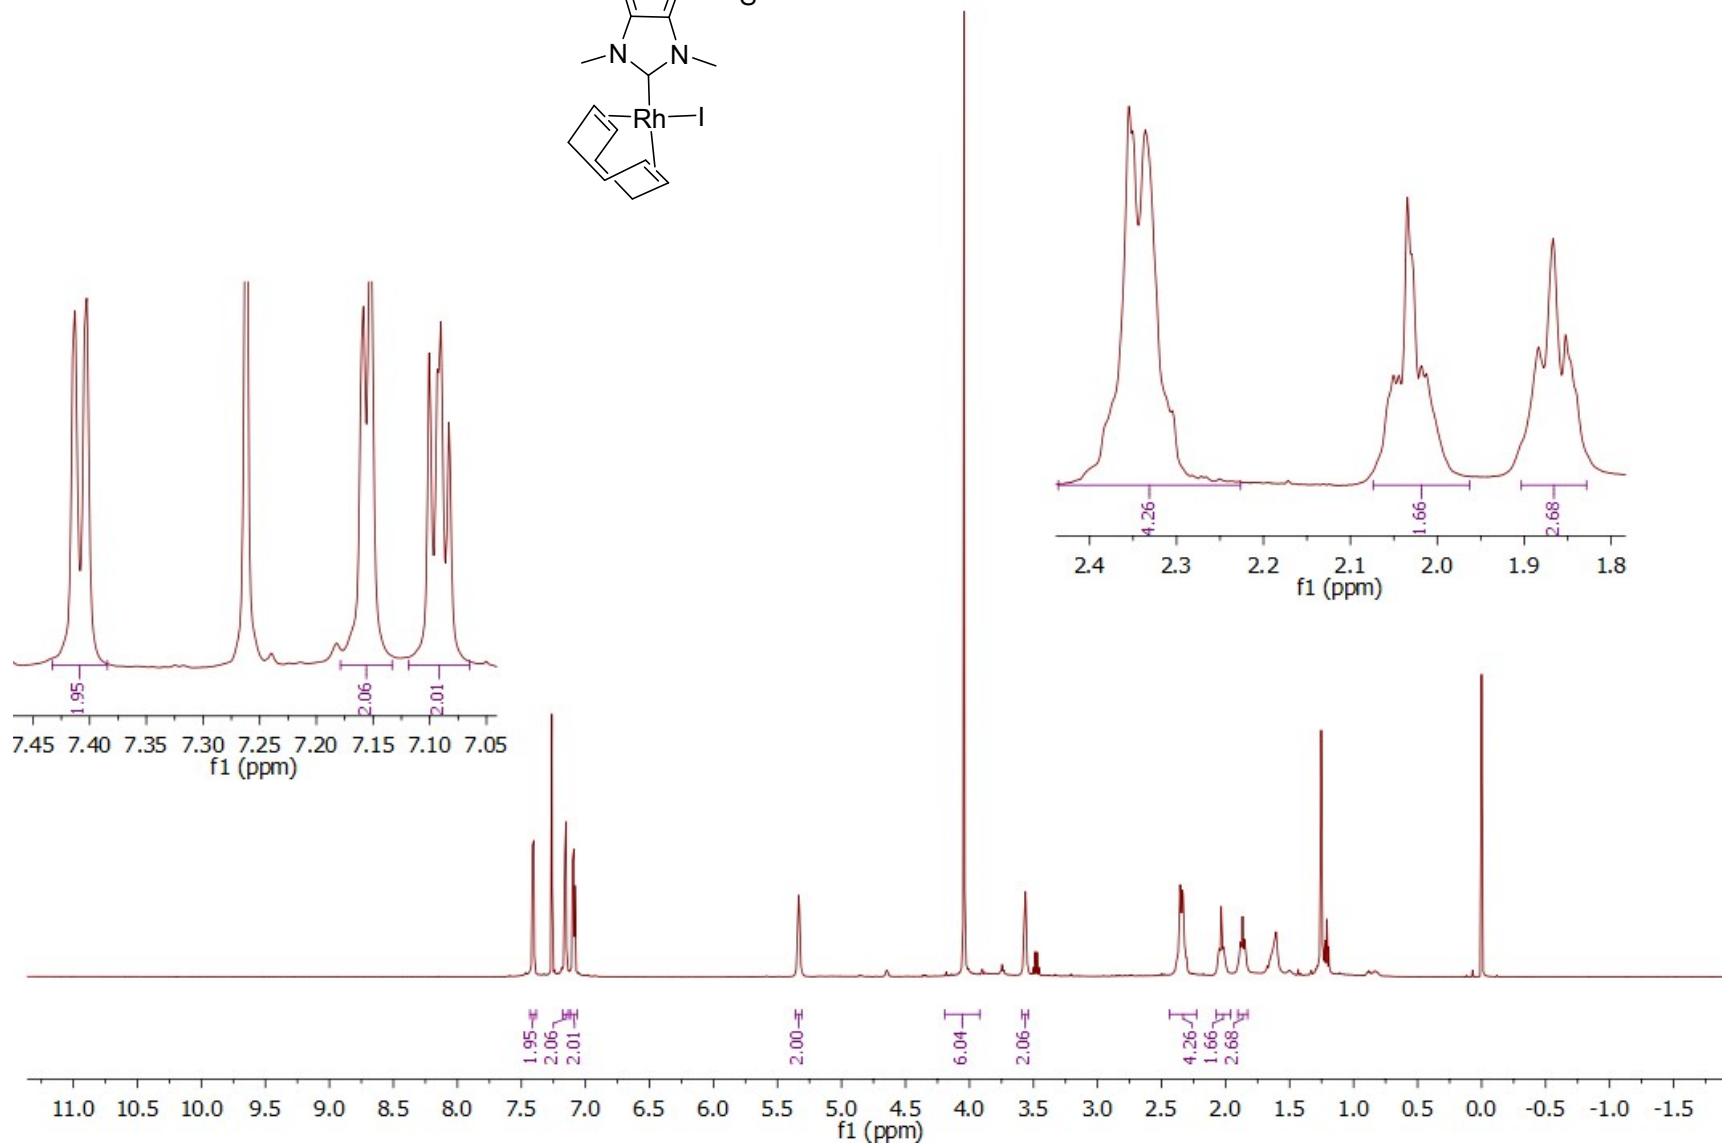

1\_13C\_NMR

—212.63

136.55  
130.81  
129.23  
129.04  
128.23  
127.65  
127.59

—106.38

99.00  
98.95

77.27 CDCl3  
77.02 CDCl3  
76.77 CDCl3  
72.24  
72.13

36.99  
32.26  
29.72  
29.43

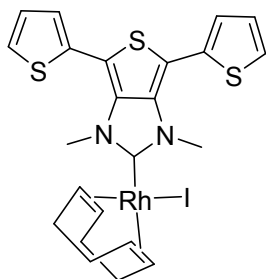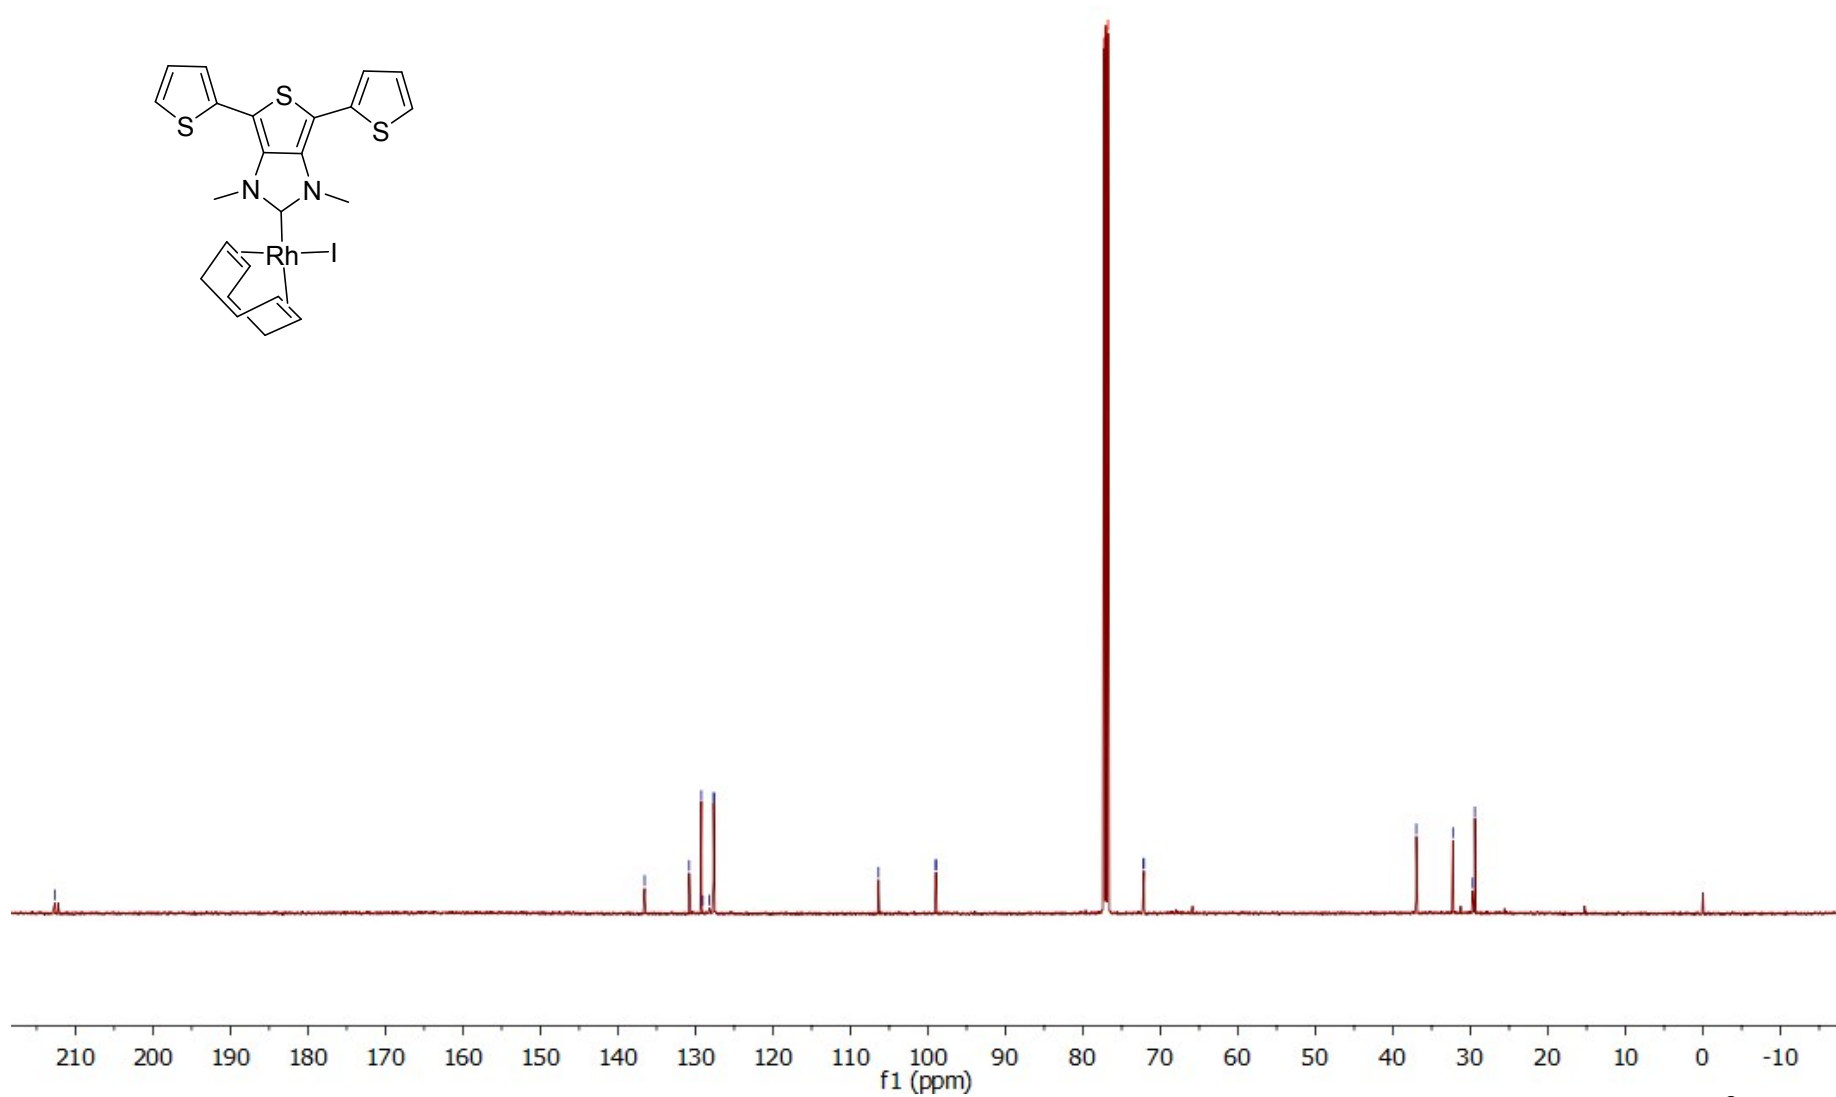



2\_1H\_NMR

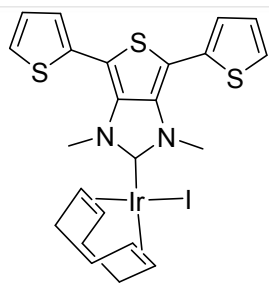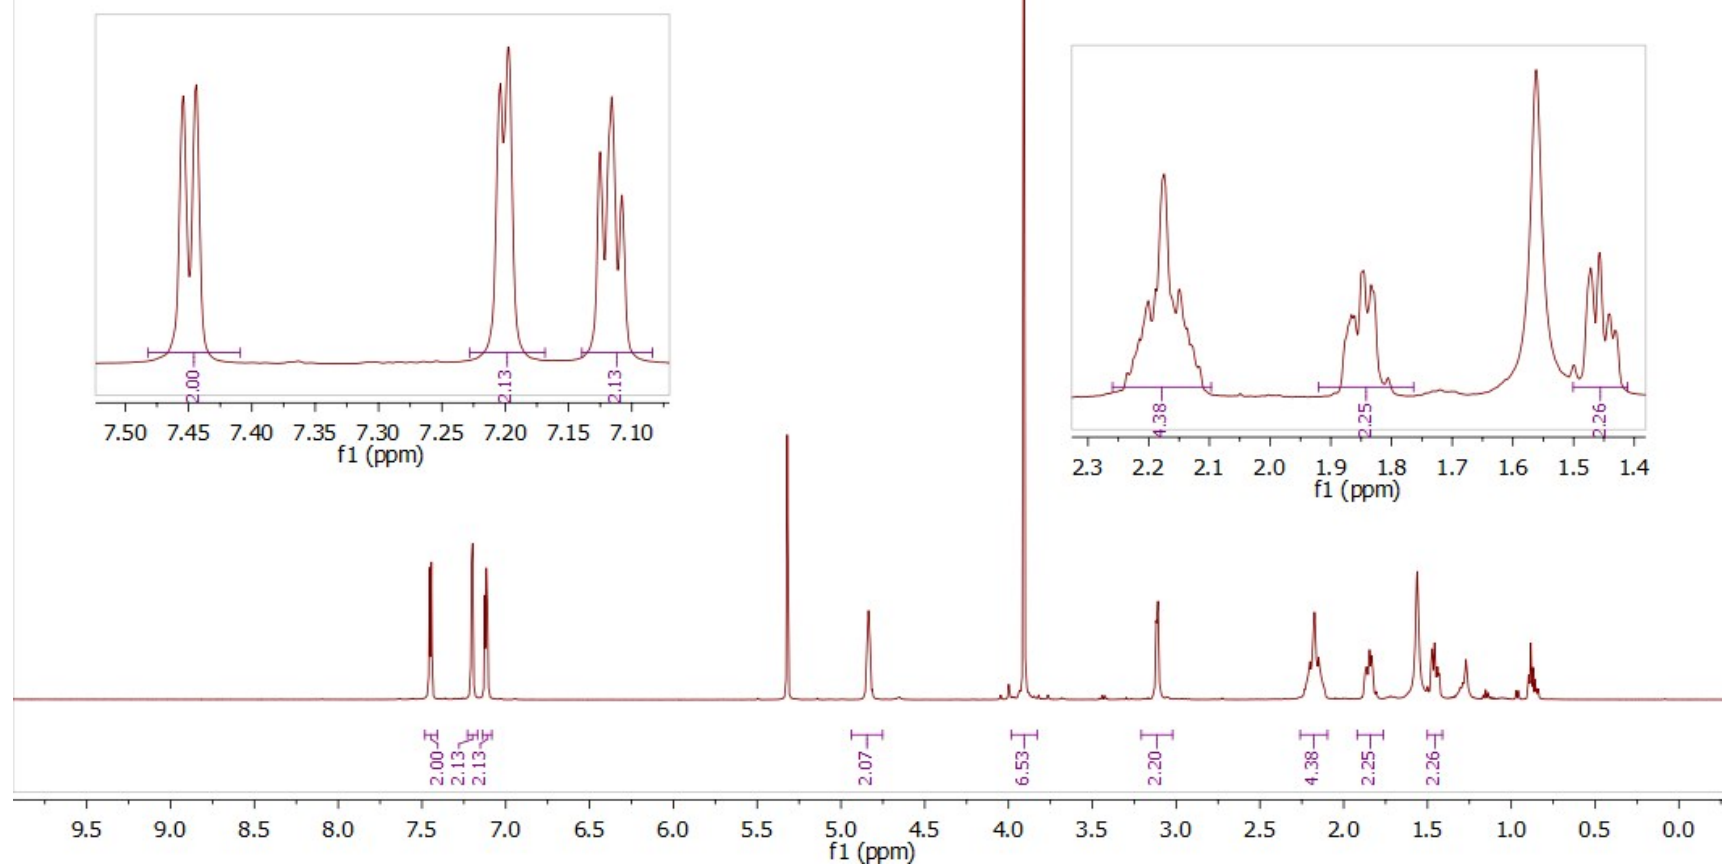

2\_13C\_NMR

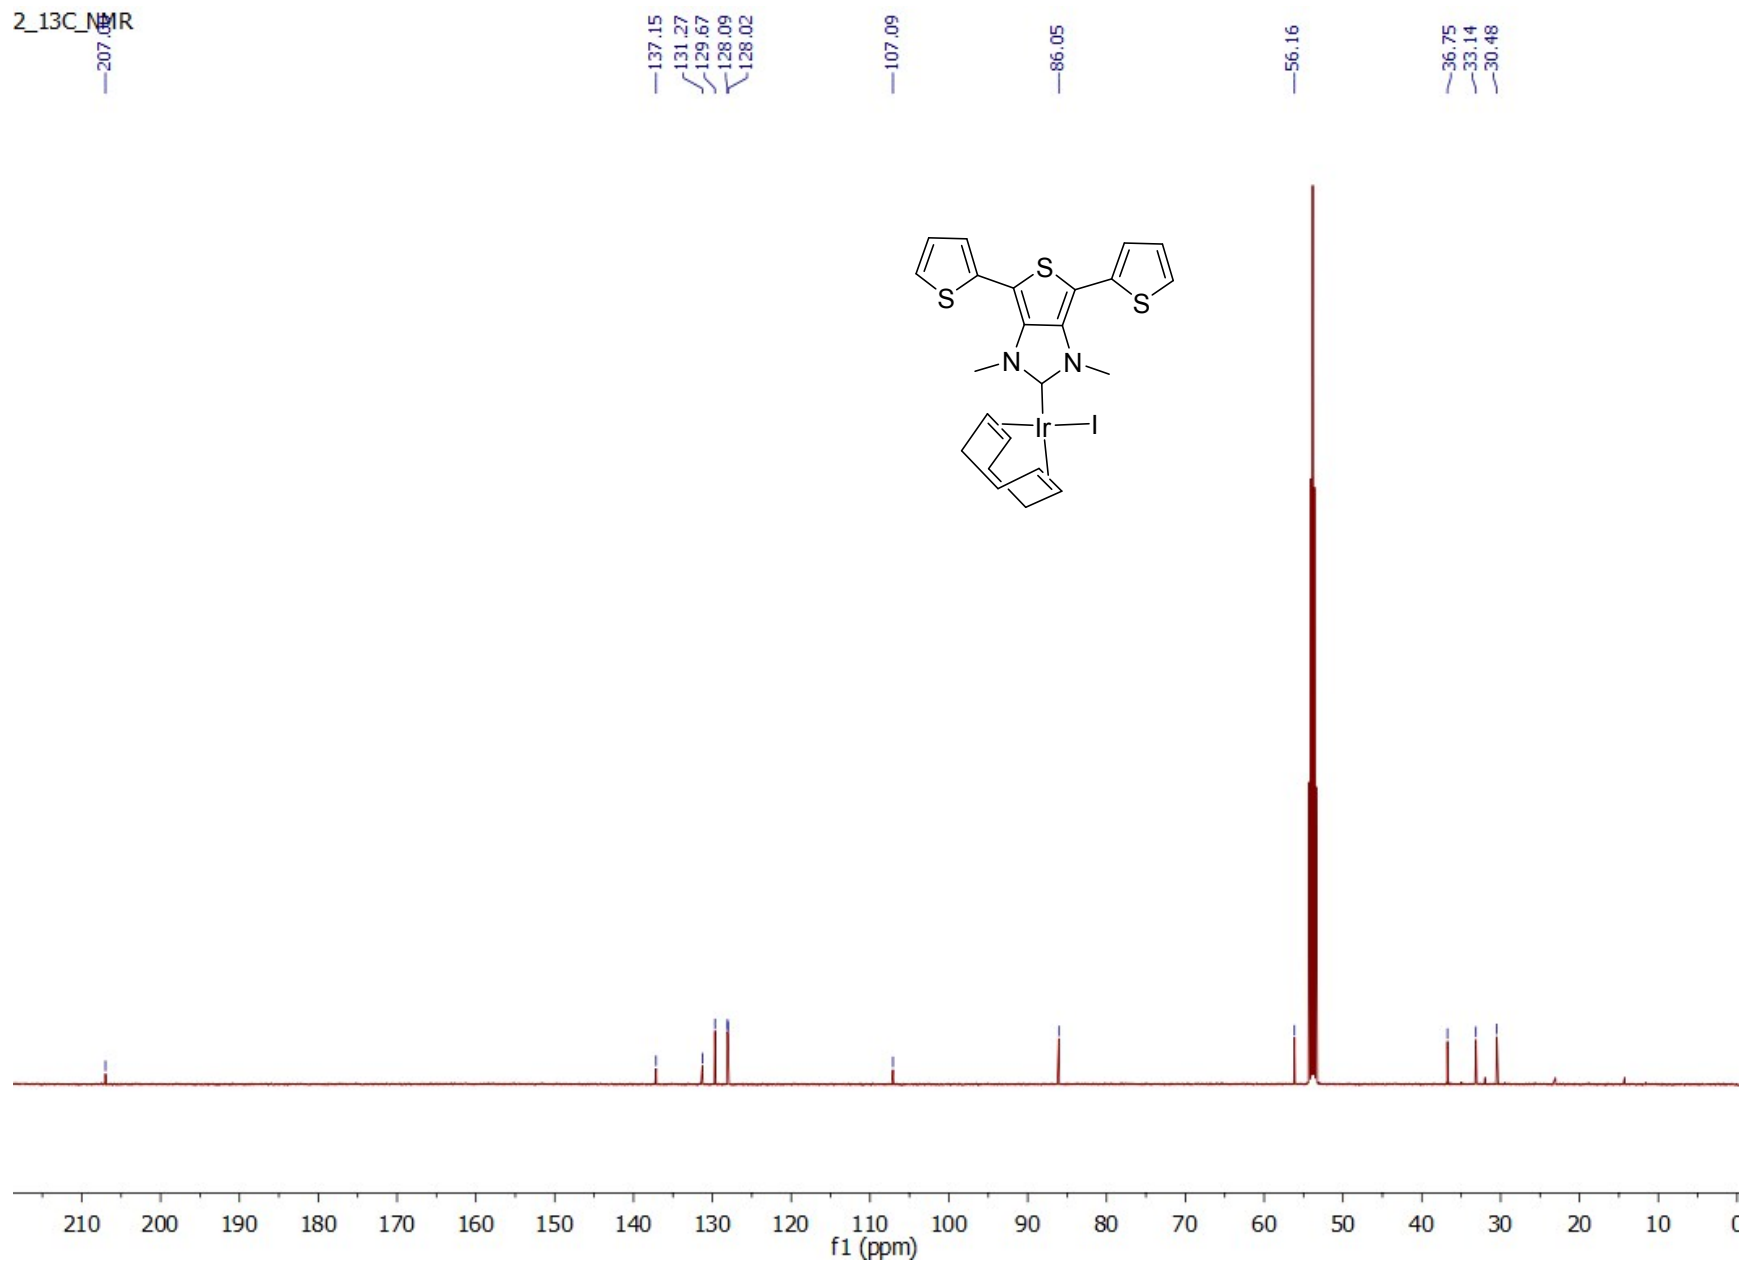

Supplement: c9dt04844h1.pdf [file c9dt04844h1.pdf]
